# Supplementary material for: Enhancing the performance of hard carbon for sodium-ion batteries by coating with silicon nitride/oxycarbide nanoparticles
Source: Royal Society of Chemistry journal article supplement (doi:10.1039/d1ma00613d), 2021-01-01
Supplement: d1ma00613d1.pdf [file d1ma00613d1.pdf]

## Supplementary information: Enhancing the performance of hard carbon for sodium-ion batteries by coating with silicon nitride/oxycarbide nanoparticles

Hang Cheng, Nuria Garcia-Araez, and Andrew L. Hector\*

School of Chemistry, University of Southampton, Southampton SO17 1BJ, United Kingdom

**Fig. S1** First cycle charge-discharge capacity curves (sodium half-cells with  $1 \text{ mol dm}^{-3}$   $\text{NaClO}_4$  in EC/DEC electrolyte using a current of  $50 \text{ mA g}^{-1}$ ) of composites of hard carbon with (a) silicon nitride and (b) silicon carbide produced by reacting cellulose with different volumes of silicon chloride (as labelled) and firing under nitrogen or argon at  $1400 \text{ }^\circ\text{C}$ .

**Fig. S2** XRD patterns of HC-SiOC-0.4 composites obtained at  $1200$  and  $1400 \text{ }^\circ\text{C}$ .

**Fig. S3** TGA and differential TGA results of (a) HC-SiN<sub>x</sub>-0.4 and (b) HC-SiOC-0.4 composites. The gas mixture was Ar ( $50 \text{ mL min}^{-1}$ ) and O<sub>2</sub> ( $20 \text{ mL min}^{-1}$ ) and the heating rate was  $4 \text{ }^\circ\text{C min}^{-1}$ .

**Fig. S4** Raman spectra of hard carbon composites with (a) silicon nitride and (b) silicon oxycarbide, showing spectra for the highest loading composites made to highlight the presence of features due to Si-N and Si-C bonds. Broken lines highlight the presence of features due to Si-N and Si-C bonds.

**Fig. S5** Raman spectra of hard carbon composites with (a) silicon nitrides and (b) silicon oxycarbides with loadings as labelled.

**Fig. S6** Typical Raman spectrum fitting of HC-SiN<sub>x</sub>-0.4 composite.

**Fig. S7** Nitrogen adsorption-desorption isotherms of hard carbon composites with (a) silicon nitrides and (b) silicon oxycarbides with loadings as labelled.

**Fig. S8** Pore size distribution of hard carbon coated with (a) silicon nitride and (b) silicon oxycarbide with loadings as labelled, calculated using the DFT method.

**Fig. S9** The survey spectra of HC-SiN<sub>x</sub>-0.4 and HC-SiOC-0.4 electrodes.

**Fig. S10** Si 2p spectra of (a) HC-SiN<sub>x</sub>-0.4 and (b) HC-SiOC-0.4 electrodes after sodiation (sodium half-cells with  $1 \text{ mol dm}^{-3}$   $\text{NaClO}_4$  in EC/DEC electrolyte using a current of  $50 \text{ mA g}^{-1}$ ) with no Ar<sup>+</sup> etching.

**Fig. S11** N 1s spectrum of HC-SiN<sub>x</sub>-0.4 electrodes after sodiation (sodium half-cells with  $1 \text{ mol dm}^{-3}$   $\text{NaClO}_4$  in EC/DEC electrolyte using a current of  $50 \text{ mA g}^{-1}$ ) and Ar<sup>+</sup> etching for 5 min.

**Fig. S12** First cycle differential capacity plots (sodium half-cells with  $1 \text{ mol dm}^{-3}$   $\text{NaClO}_4$  in EC/DEC electrolyte using a current of  $50 \text{ mA g}^{-1}$ ) of hard carbon composites with (a) silicon nitride and (b) silicon oxycarbide with loadings as labelled.

**Fig. S13** Enlarged view of the differential capacity plots shown in Fig. S12 in the 0-0.5 V voltage region.

**Fig. S14** Enlarged view of differential capacity plots (sodium half-cells with  $1 \text{ mol dm}^{-3}$   $\text{NaClO}_4$  in EC/DEC electrolyte using a current of  $50 \text{ mA g}^{-1}$ ) of (a) HC-SiN<sub>x</sub>-0.4 and (b) HC-SiOC-0.4, for different cycles, as labelled.

**Fig. S15** Enlarged view of differential capacity plots (sodium half-cells with  $1 \text{ mol dm}^{-3}$   $\text{NaClO}_4$  in EC/DEC electrolyte using a current of  $50 \text{ mA g}^{-1}$ ) of (a) HC-N<sub>2</sub> and (b) HC-Ar, for different cycles, as labelled.

**Fig. S16** Nyquist plots (frequency range from 0.05 Hz to 500 kHz, at open circuit potential with the electrode in the oxidised condition) of (a) HC-SiN<sub>x</sub>-0.4 and (b) HC-SiOC-0.4, before and after 50 cycles (sodium half-cells with  $1 \text{ mol dm}^{-3}$   $\text{NaClO}_4$  in EC/DEC electrolyte using a current of  $50 \text{ mA g}^{-1}$  and a potential range of 2V – 5 mV).

**Fig. S17** Nyquist plots (frequency range from 0.05 Hz to 500 kHz, at open circuit potential with the electrode in the oxidised condition) of (a) HC-N<sub>2</sub> and (b) HC-Ar, before and after 50 cycles (sodium half-cells with  $1 \text{ mol dm}^{-3}$   $\text{NaClO}_4$  in EC/DEC electrolyte using a current of  $50 \text{ mA g}^{-1}$  and a potential range of 2V – 5 mV).

**Fig. S18** The C 1s depth profile of (a) HC-SiN<sub>x</sub>-0.4 and (b) HC-SiOC-0.4 composites after first discharging (sodium half-cells with  $1 \text{ mol dm}^{-3}$   $\text{NaClO}_4$  in EC/DEC electrolyte using a current of  $50 \text{ mA g}^{-1}$ ) as a function of Ar-ion etch time.

**Fig. S19** C1s spectra of (a) HC-SiN<sub>x</sub>-0.4 and (b) HC-SiOC-0.4 electrodes sodiated in  $1 \text{ mol dm}^{-3}$   $\text{NaClO}_4$  in EC/DEC electrolyte. Measurements at various depths by Ar<sup>+</sup> sputtering.

**Equation S1** Reaction equations for carbothermal formation of silicon nitride and silicon carbide.

**Table S1** Comparison of sodium storage performance between HC-SiN<sub>x</sub>-0.4 and previously reported hard carbons.

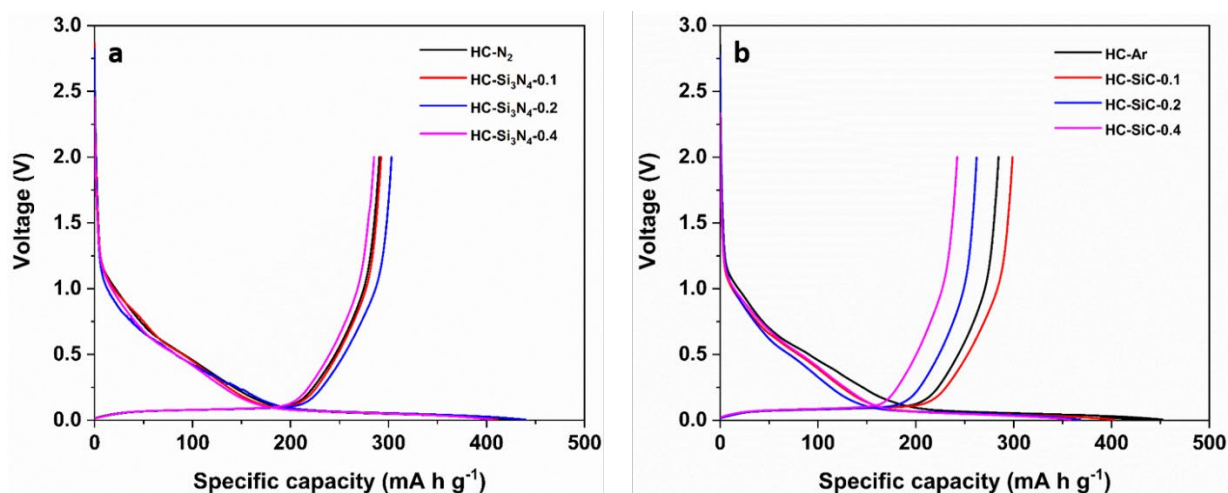

**Fig. S1** First cycle charge-discharge capacity curves (sodium half-cells with  $1 \text{ mol dm}^{-3}$   $\text{NaClO}_4$  in EC/DEC electrolyte using a current of  $50 \text{ mA g}^{-1}$ ) of composites of hard carbon with (a) silicon nitride and (b) silicon carbide produced by reacting cellulose with different volumes of silicon chloride (as labelled) and firing under nitrogen or argon at  $1400 \text{ }^\circ\text{C}$ .

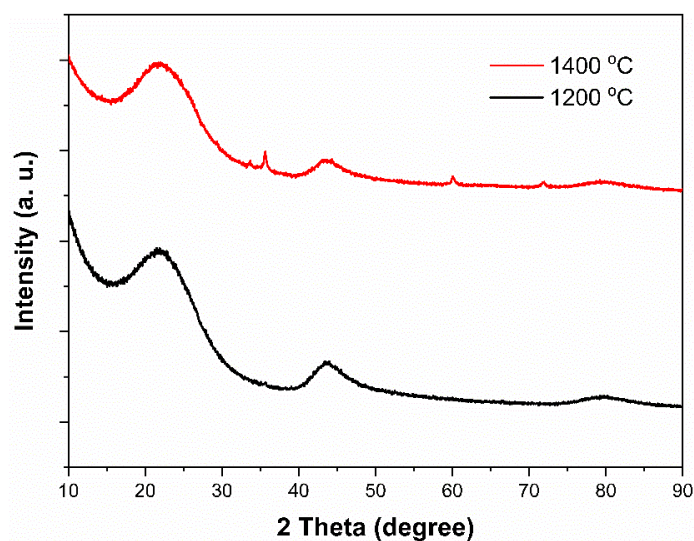

**Fig. S2** XRD patterns of HC-SiOC-0.4 composites obtained at  $1200$  and  $1400 \text{ }^\circ\text{C}$ .

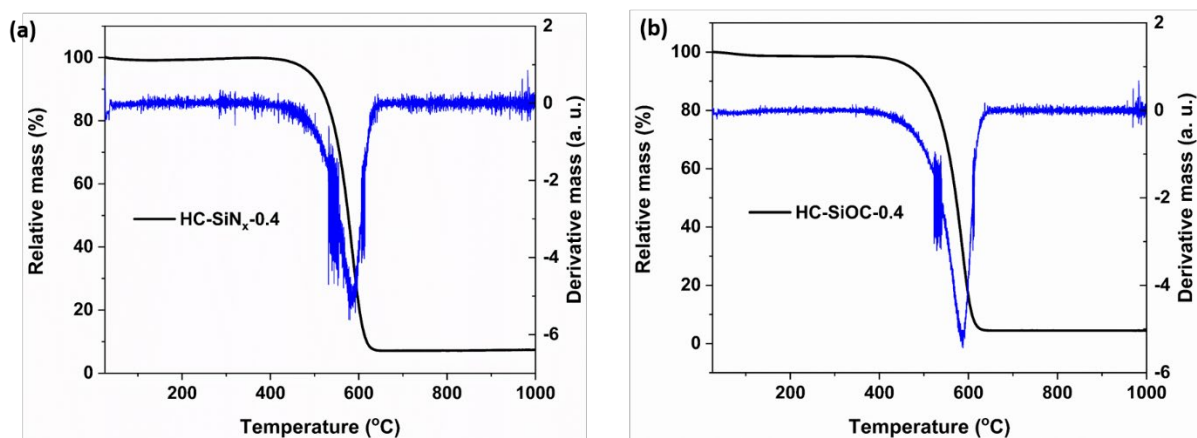

**Fig. S3** TGA and differential TGA results of (a) HC-SiN<sub>x</sub>-0.4 and (b) HC-SiOC-0.4 composites. The gas mixture was Ar (50 mL min<sup>-1</sup>) and O<sub>2</sub> (20 mL min<sup>-1</sup>) and the heating rate was 4 °C min<sup>-1</sup>.

**Table S1.** Residual mass (wt%) in TGA measurements

| Sample                   | Residual mass (wt%) |
|--------------------------|---------------------|
| HC-SiN <sub>x</sub> -0.1 | 5.93                |
| HC-SiN <sub>x</sub> -0.2 | 6.47                |
| HC-SiN <sub>x</sub> -0.4 | 8.92                |
| HC-SiN <sub>x</sub> -0.8 | 13.43               |
| HC-SiOC-0.1              | 5.10                |
| HC-SiOC-0.2              | 5.21                |
| HC-SiOC-0.4              | 5.80                |
| HC-SiOC-0.8              | 6.59                |

Estimation of the silicon nitride and oxycarbide content from thermogravimetric analysis

The residual mass after the sample was combusted in the TGA was 8.92% for the HC-SiN<sub>x</sub>-0.4 composite and 5.80% for HC-SiOC-0.4. Due to the possibility that the silicon species do not fully oxidise the residual mass would be expected to be in a range between the following values:

1) Taking the mass of HC-SiN<sub>x</sub>-0.4 composite as “m”, and the mass proportion of Si<sub>3</sub>N<sub>4</sub> in the composite as “x”, considering the combustion reaction (1a), the expected mass of SiO<sub>2</sub> remaining after combustion would be 180.27mx/140.27, from which the value of x (that is, the Si<sub>3</sub>N<sub>4</sub> mass content) is found to be 6.94%. Considering a nitrogen-deficient silicon nitride such as SiN, following the same type of calculations gives a value of x of 6.25%. For the HC-SiOC-0.4 composite, similar calculations give a SiC or SiOC mass content in the sample of 3.87 or 5.41%.

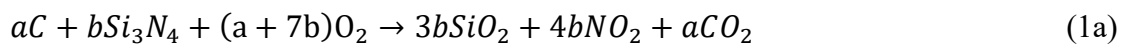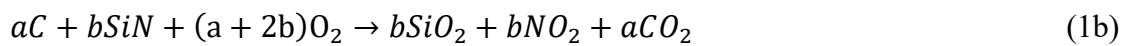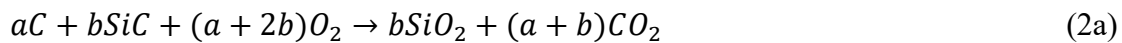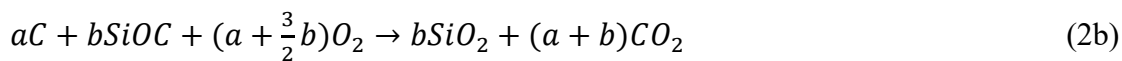

2) If we consider the reactions in which the carbon is combusted but the silicon nitride or (oxy)carbide is unchanged (equations 3&4), the mass content of silicon nitride or (oxy)carbide is found to be 8.92% in HC-SiN<sub>x</sub>-0.4 and 5.80% in HC-SiOC-0.4.

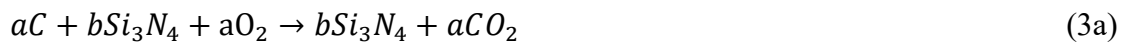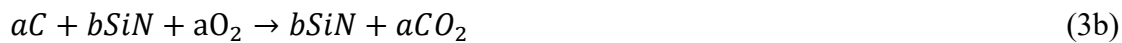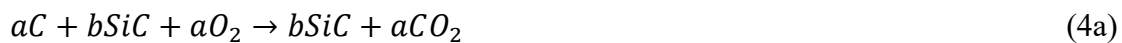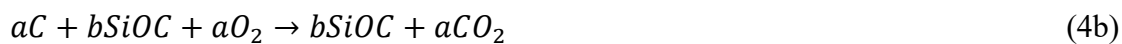

In table 1, we report the average and standard deviation of the estimations of the SiN<sub>x</sub> or SiOC content in the samples obtained considering reactions 1b and 3, and reactions 2a and 4, since the results with reactions 1a and 2b lie in between these two extreme scenarios.

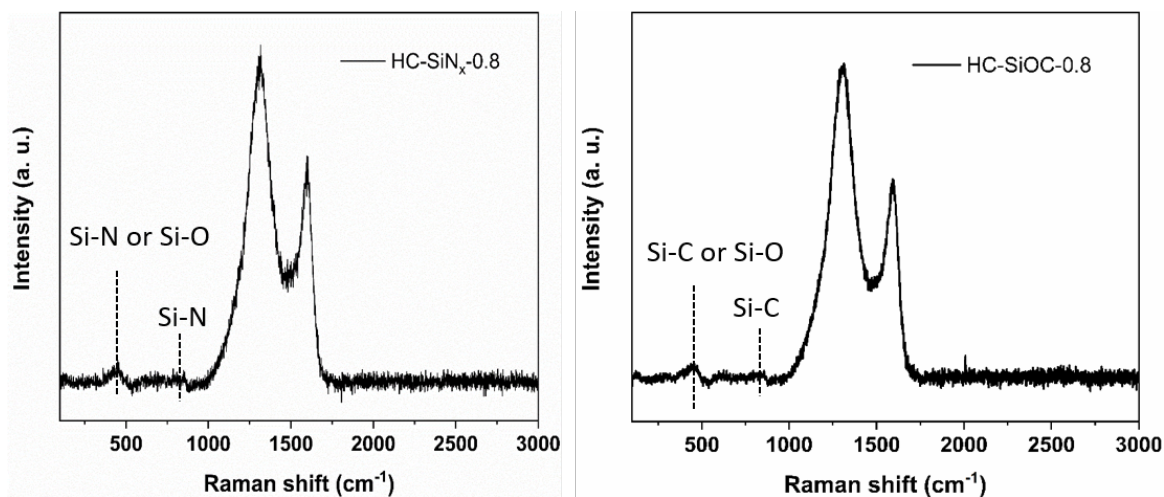

**Fig. S4** Raman spectra of hard carbon composites with (a) silicon nitride and (b) silicon oxycarbide, showing spectra for the highest loading composites. Broken lines highlight the presence of features due to Si-N and Si-C bonds.

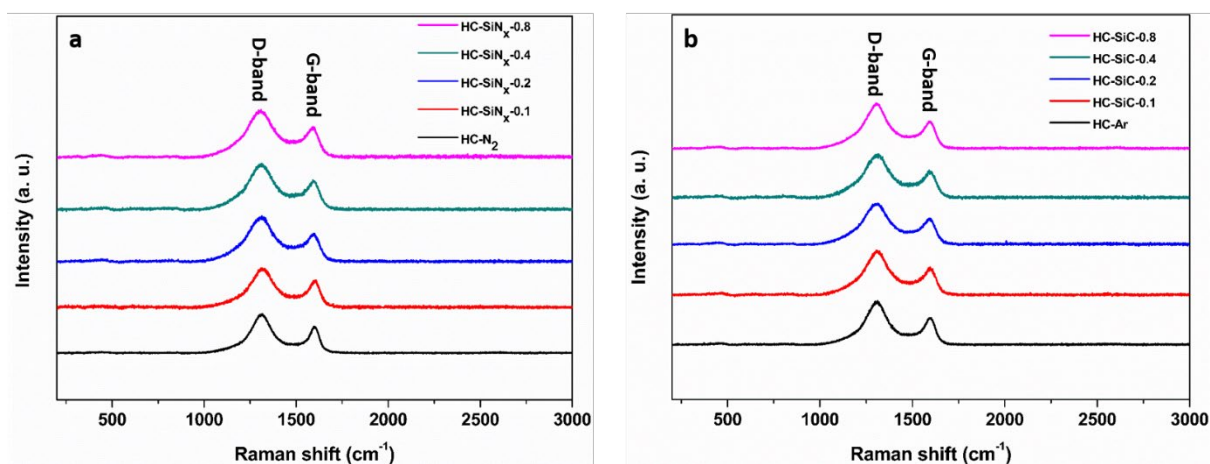

**Fig. S5** Raman spectra of hard carbon composites with (a) silicon nitride and (b) silicon oxycarbide with loadings as labelled.

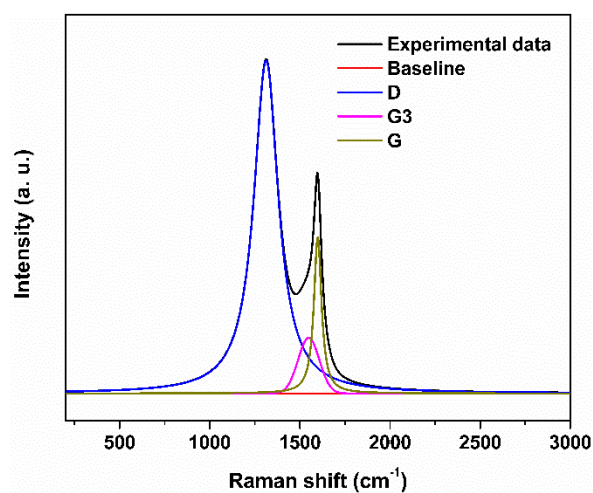

**Fig. S6** Typical Raman spectrum fitting for the HC-SiN<sub>x</sub>-0.4 composite.

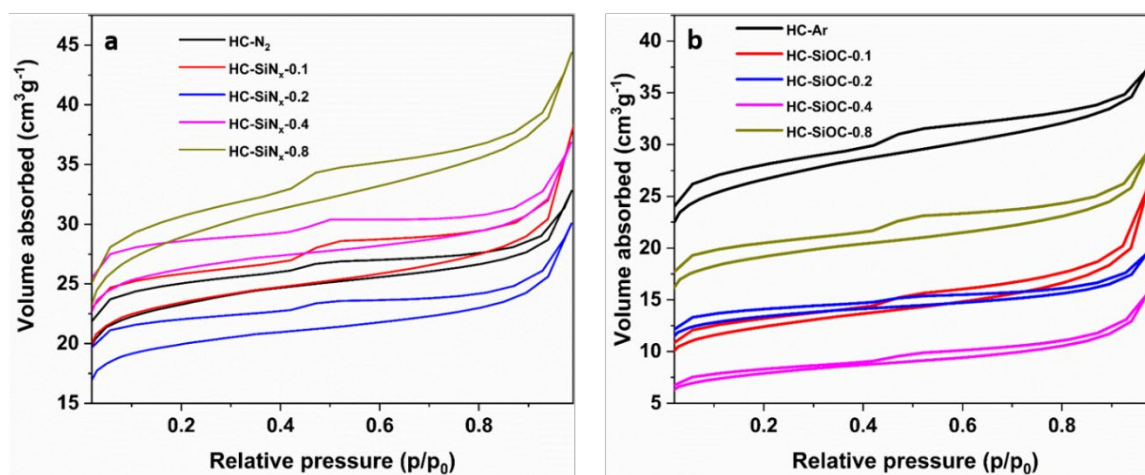

**Fig. S7** Nitrogen adsorption-desorption isotherms of hard carbon composites with (a) silicon nitride and (b) silicon oxycarbide with loadings as labelled.

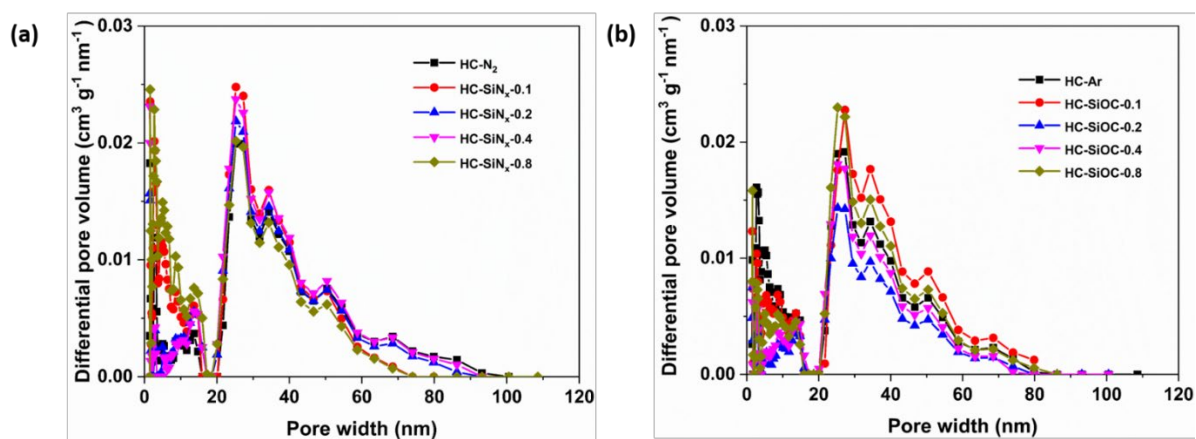

**Fig. S8** Pore size distribution of hard carbon coated with (a) silicon nitride and (b) silicon oxycarbide with loadings as labelled, calculated using the DFT method.

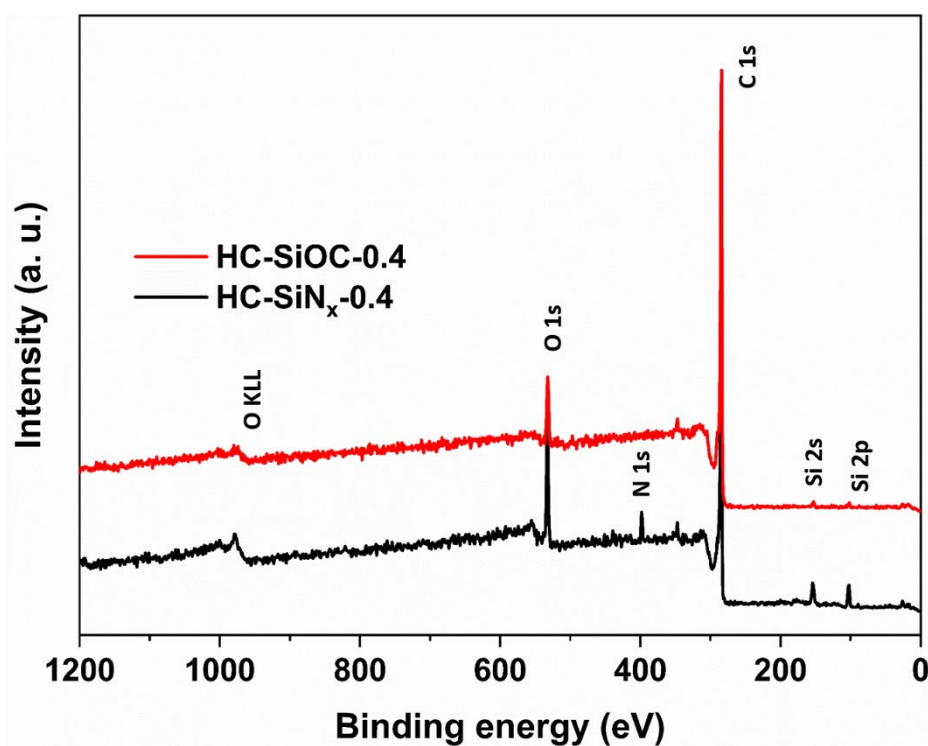

**Fig. S9** The survey spectra of HC-SiN<sub>x</sub>-0.4 and HC-SiOC-0.4 electrodes.



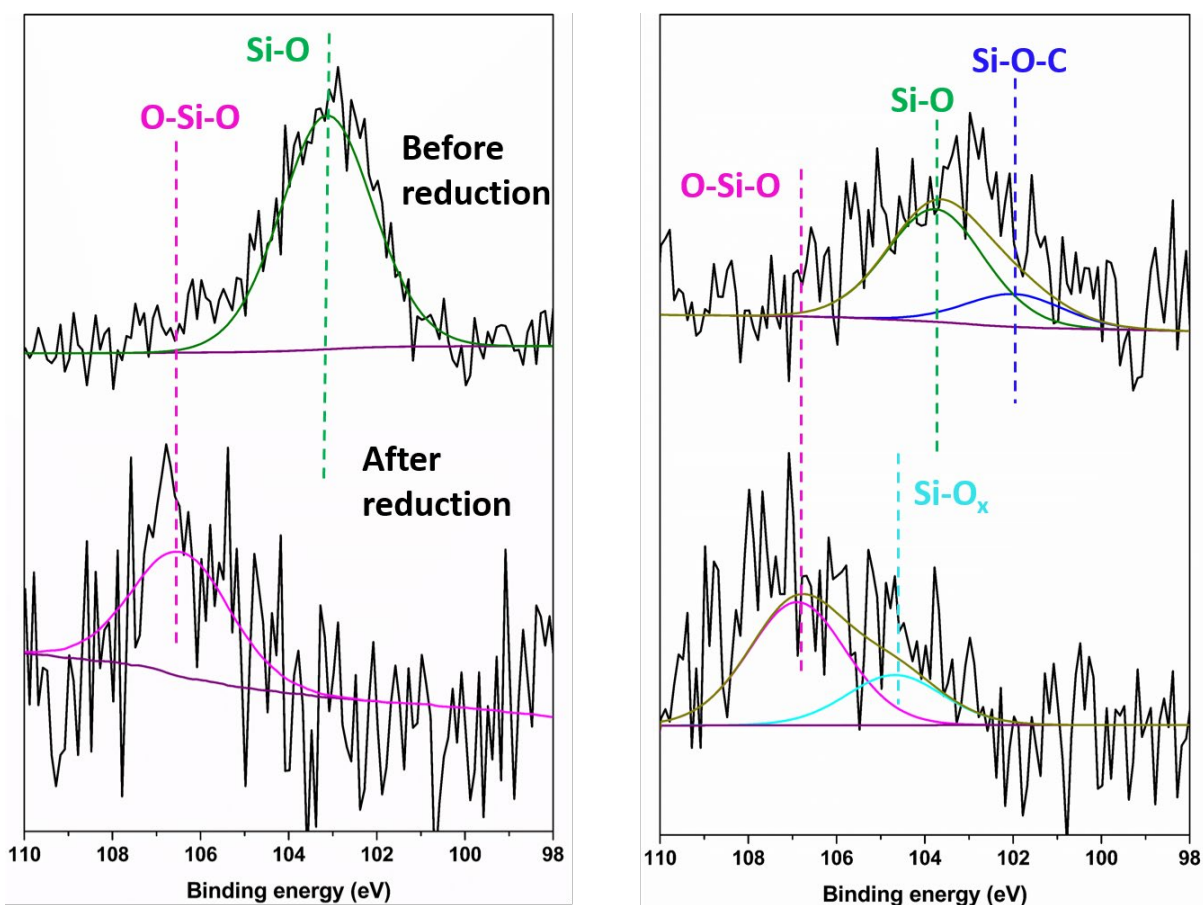

**Fig. S10** Si 2p spectra of (a) HC-Si<sub>x</sub>-0.4 and (b) HC-SiOC-0.4 electrodes before and after reduction in sodium half-cells with 1 mol dm<sup>-3</sup> NaClO<sub>4</sub> in EC/DEC electrolyte using a current of 50 mA g<sup>-1</sup>, with no Ar<sup>+</sup> etching prior to the XPS measurements.

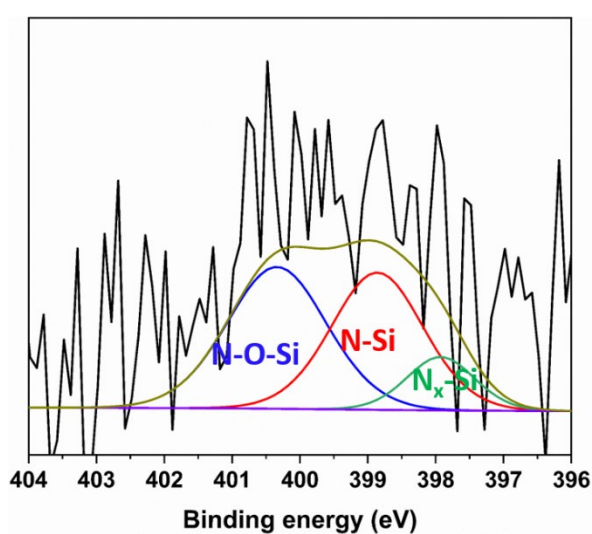

**Fig. S11** N 1s spectrum of HC-Si<sub>x</sub>-0.4 electrodes after reduction in sodium half-cells with 1 mol dm<sup>-3</sup> NaClO<sub>4</sub> in EC/DEC electrolyte using a current of 50 mA g<sup>-1</sup>, and Ar<sup>+</sup> etching for 5 min prior to the XPS measurements.

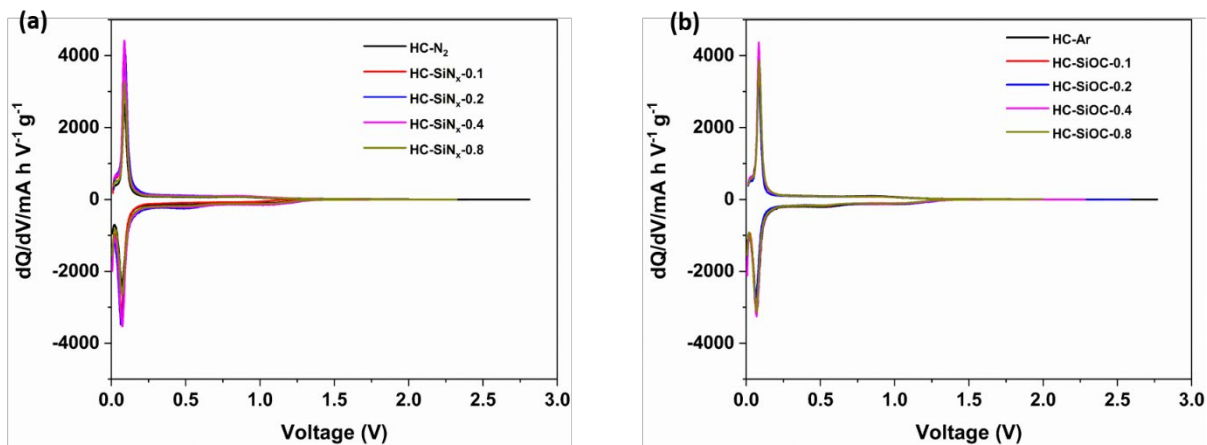

**Fig. S12** First cycle differential capacity plots (sodium half-cells with  $1 \text{ mol dm}^{-3} \text{ NaClO}_4$  in EC/DEC electrolyte using a current of  $50 \text{ mA g}^{-1}$ ) of hard carbon composites with (a) silicon nitride and (b) silicon oxycarbide with loadings as labelled.

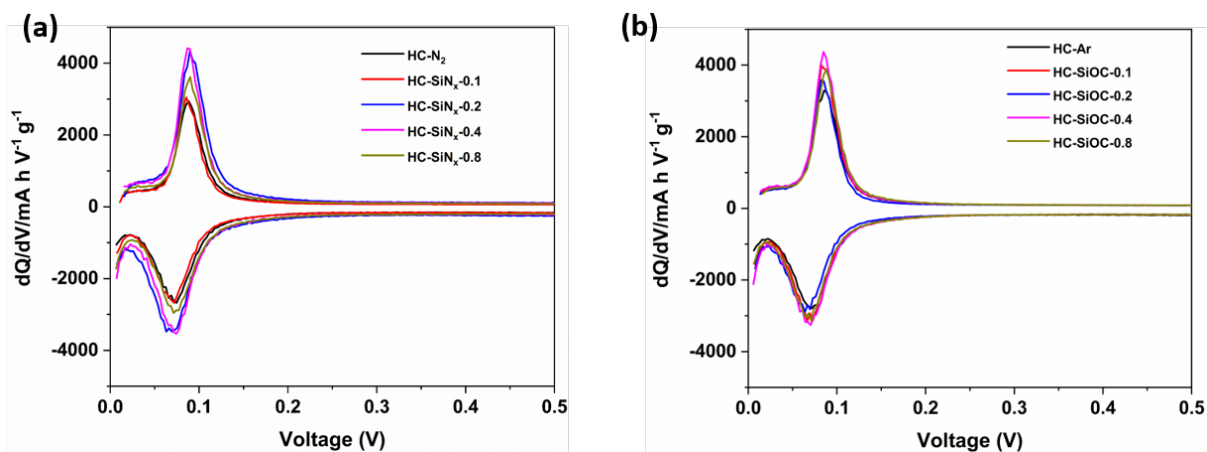

**Fig. S13** Enlarged view of the differential capacity plots shown in figure S12 in the 0-0.5 V voltage region.

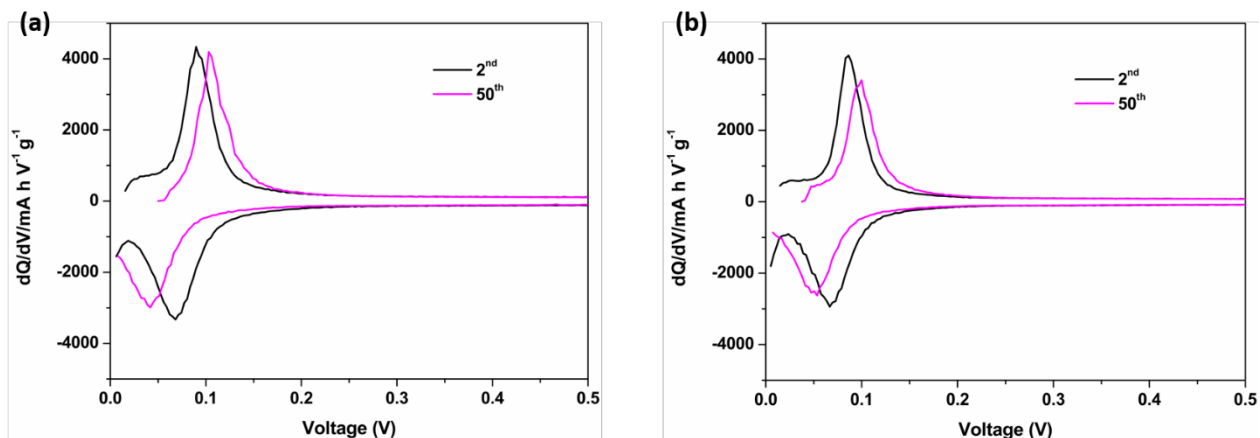

Fig. S14 Enlarged view of differential capacity plots (sodium half-cells with  $1 \text{ mol dm}^{-3}$  NaClO<sub>4</sub> in EC/DEC electrolyte using a current of  $50 \text{ mA g}^{-1}$ ) of (a) HC-SiN<sub>x</sub>-0.4 and (b) HC-SiOC-0.4, for different cycles, as labelled.

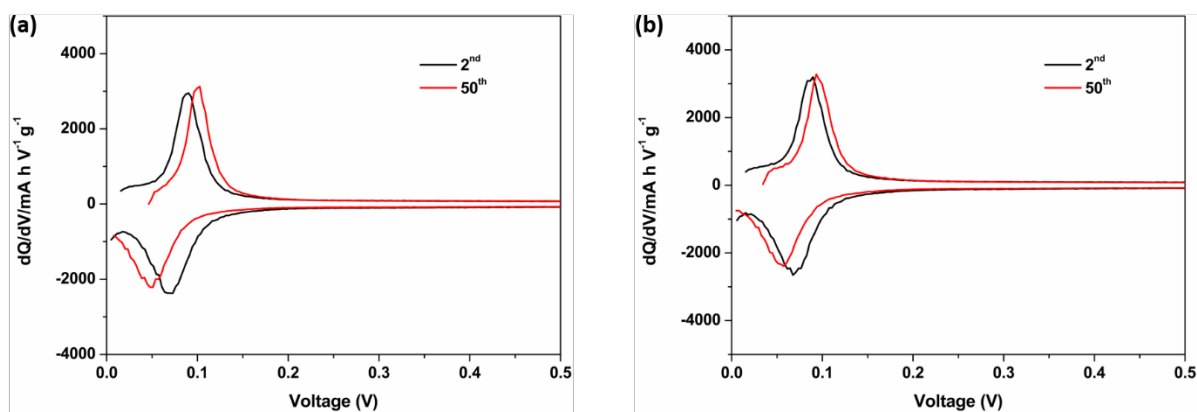

Fig. S15 Enlarged view of differential capacity plots (sodium half-cells with  $1 \text{ mol dm}^{-3}$  NaClO<sub>4</sub> in EC/DEC electrolyte using a current of  $50 \text{ mA g}^{-1}$ ) of (a) HC-N<sub>2</sub> and (b) HC-Ar, for different cycles, as labelled.

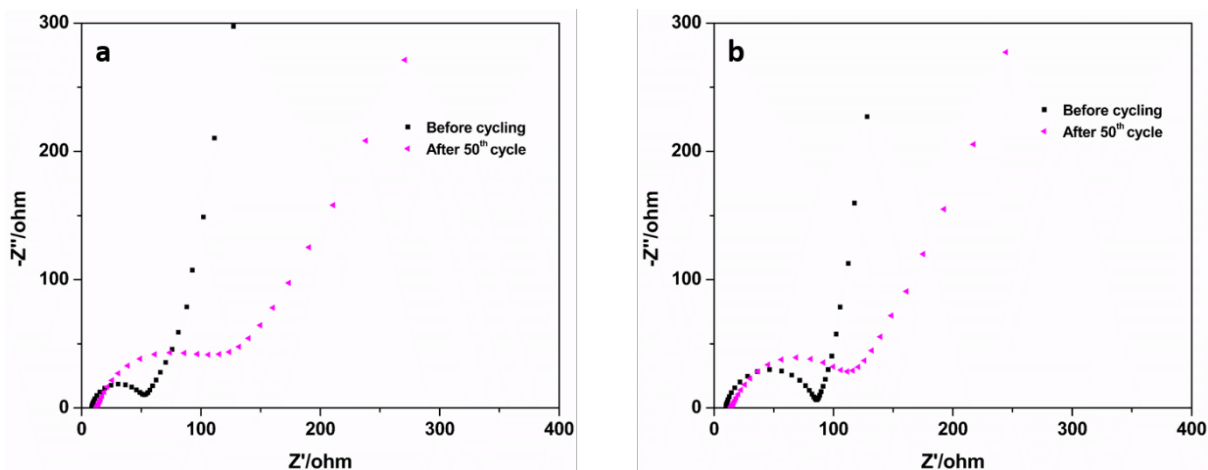

**Fig. S16** Nyquist plots (frequency range from 0.05 Hz to 500 kHz, at open circuit potential with the electrode in the oxidised condition) of (a) HC-SiN<sub>x</sub>-0.4 and (b) HC-SiOC-0.4, before and after 50 cycles (sodium half-cells with 1 mol dm<sup>-3</sup> NaClO<sub>4</sub> in EC/DEC electrolyte using a current of 50 mA g<sup>-1</sup> and a potential range of 2V – 5 mV).

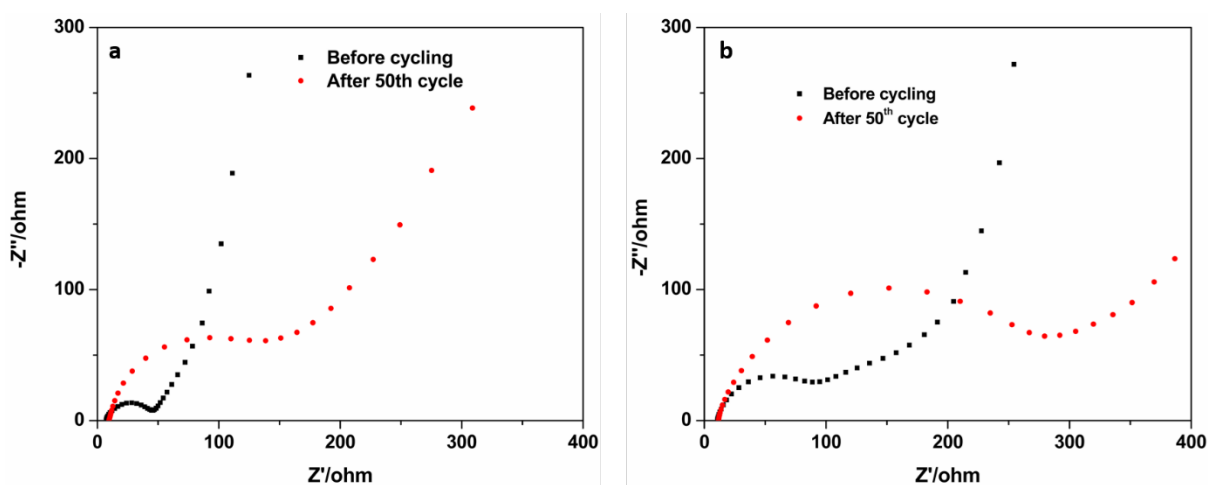

**Fig. S17** Nyquist plots (frequency range from 0.05 Hz to 500 kHz, at open circuit potential with the electrode in the oxidised condition) of (a) HC-N<sub>2</sub> and (b) HC-Ar, before and after 50 cycles (sodium half-cells with 1 mol dm<sup>-3</sup> NaClO<sub>4</sub> in EC/DEC electrolyte using a current of 50 mA g<sup>-1</sup> and a potential range of 2V – 5 mV).

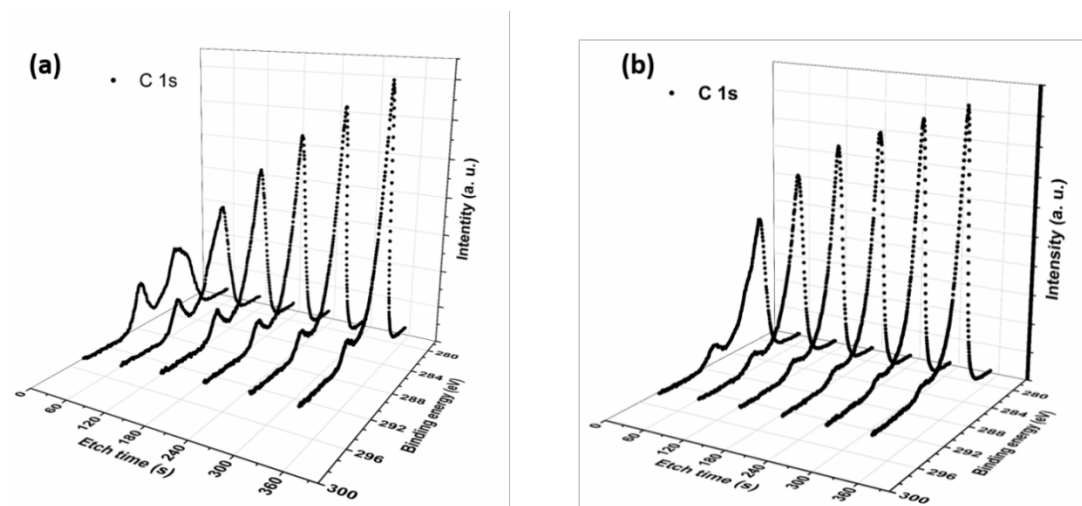

**Fig. S18** The C 1s depth profile of (a) HC-SiN<sub>x</sub>-0.4 and (b) HC-SiOC-0.4 composites after the first reduction in sodium half-cells with 1 mol dm<sup>-3</sup> NaClO<sub>4</sub> in EC/DEC electrolyte using a current of 50 mA g<sup>-1</sup>, as a function of Ar-ion etch time.

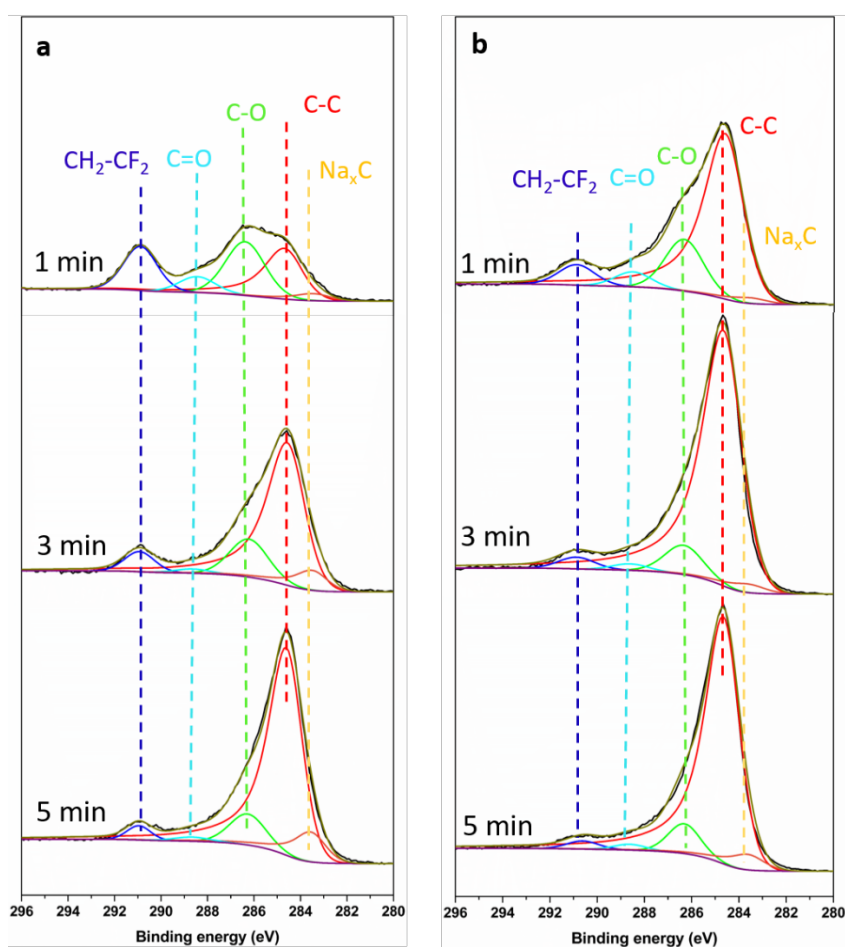

**Fig. S19** C1s spectra of (a) HC-SiN<sub>x</sub>-0.4 and (b) HC-SiOC-0.4 electrodes sodiated in 1 mol dm<sup>-3</sup> NaClO<sub>4</sub> in EC/DEC electrolyte. Measurements at various depths by Ar<sup>+</sup> sputtering.

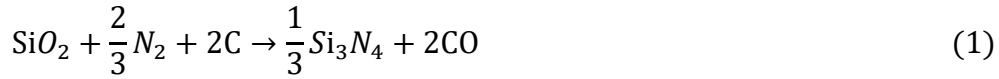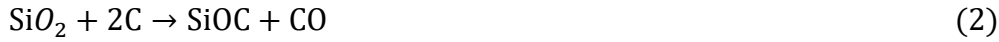

**Equation S1** Suggested possible reactions for carbothermal formation of silicon nitride and silicon (oxy)carbide.

**Table S2** Comparison of sodium storage performance between HC-SiNx-0.4 and previously reported hard carbons.

| Materials                    | Precursor            | Mas loading (mg cm <sup>-2</sup> ) | Electrolyte                              | Voltage window | Oxidation capacity                                  | ICE(%) | Reference     |
|------------------------------|----------------------|------------------------------------|------------------------------------------|----------------|-----------------------------------------------------|--------|---------------|
| HC-SiNx-0.4                  | Cotton wool          | 2-2.5, Swagelok cells              | 1 M NaClO <sub>4</sub> in EC/DEC         | 0.005-2 V      | 351 mA h g <sup>-1</sup> at 50 mA g <sup>-1</sup>   | 69     | This work     |
| Hard carbon                  | Apple                | 0.97-1.05, Swagelok cells          | 1 M NaClO <sub>4</sub> in EC/PC          | 0.02-3 V       | 230 mA h g <sup>-1</sup> at 20 mA g <sup>-1</sup>   | 61     | <sup>1</sup>  |
| Carbon nanofibers            | Cellulose nanofibres | 1-1.2, coin cells (CR2032)         | 1 M NaClO <sub>4</sub> in EC/PC          | 0.01-2 V       | 255 mA h g <sup>-1</sup> at 40 mA g <sup>-1</sup>   | 58.8   | <sup>2</sup>  |
| Carbon membranes             | Leaf                 | N/A, coin cells (CR2032)           | 1 M NaClO <sub>4</sub> in EC/DEC         | 0-2.5 V        | 270 mA h g <sup>-1</sup> at 40 mA g <sup>-1</sup>   | 74.8   | <sup>3</sup>  |
| Carbon nanotubes             | Cotton               | 2.5-3.5, coin cells (CR2032)       | 0.8 M NaPF <sub>6</sub> in EC/DMC        | 0-2 V          | 315 mA h g <sup>-1</sup> at 30 mA g <sup>-1</sup>   | 83     | <sup>4</sup>  |
| Carbon sheets                | stalks               | N/A, coin cells (CR2032)           | 1 M NaClO <sub>4</sub> in EC/DEC         | 0.01-3 V       | 260 mA h g <sup>-1</sup> at 100 mA g <sup>-1</sup>  | 52.6   | <sup>5</sup>  |
| Carbon nanosheets            | Peat moss            | ~1, coin cells (CR2032)            | 1 M NaClO <sub>4</sub> in EC/DEC         | 0.001-2.8 V    | 298 mA h g <sup>-1</sup> at 50 mA g <sup>-1</sup>   | 57.5   | <sup>6</sup>  |
| Hard carbon                  | Switchgrass          | 0.5, coin cells (CR2025)           | 1 M NaClO <sub>4</sub> in EC/DEC         | 0.01-2 V       | 298 mA h g <sup>-1</sup> at 50 mA g <sup>-1</sup>   | 64     | <sup>7</sup>  |
| Activated hard carbon        | Argan shells         | 1.2-2, coin cells (CR2032)         | 1 M NaPF <sub>6</sub> in EC/DEC          | 0-2 V          | 333 mA h g <sup>-1</sup> at 50 mA g <sup>-1</sup>   | 79.0   | <sup>8</sup>  |
| Hard carbon                  | Peanut shells        | ~1.5, coin cells (CR2025)          | 1 M NaClO <sub>4</sub> in EC/PC          | 0.001-2 V      | 261 mA h g <sup>-1</sup> at 100 mA g <sup>-1</sup>  | 58±2   | <sup>9</sup>  |
| 3D free-standing hard carbon | hemp haulm           | N/A, coin cells (CR2032)           | 0.8 M NaClO <sub>4</sub> in DMC          | 0.01-3 V       | 256 mA h g <sup>-1</sup> at 37.4 mA g <sup>-1</sup> | N/A    | <sup>10</sup> |
| Hard carbon                  | Lotus seedpod        | N/A, coin cells (CR2025)           | 1 M NaClO <sub>4</sub> in PC with 2% FEC | 0.01-2.5 V     | 328.8 mA h g <sup>-1</sup> at 50 mA g <sup>-1</sup> | 50.4   | <sup>11</sup> |

## References

1. L. Wu, D. Buchholz, C. Vaalma, G. A. Giffin and S. Passerini, *ChemElectroChem*, 2016, **3**, 292-298.
2. W. Luo, J. Schardt, C. Bommier, B. Wang, J. Razink, J. Simonsen and X. Ji, *J. Mater. Chem. A*, 2013, **1**, 10662-10666.
3. H. Li, F. Shen, W. Luo, J. Dai, X. Han, Y. Chen, Y. Yao, H. Zhu, K. Fu, E. Hitz and L. Hu, *ACS Appl. Mater. Interfaces*, 2016, **8**, 2204-2210.
4. Y. Li, Y.-S. Hu, M.-M. Titirici, L. Chen and X. Huang, *Adv. Energy Mater.*, 2016, **6**, 1600659-1600667.
5. D. Qin, F. Zhang, S. Dong, Y. Zhao, G. Xu and X. Zhang, *RSC Adv.*, 2016, **6**, 106218-106224.
6. J. Ding, H. Wang, Z. Li, A. Kohandehghan, K. Cui, Z. Xu, B. Zahiri, X. Tan, E. M. Lotfabad, B. C. Olsen and D. Mitlin, *ACS Nano*, 2013, **7**, 11004-11015.
7. F. Zhang, Y. Yao, J. Wan, D. Henderson, X. Zhang and L. Hu, *ACS Appl. Mater. Interfaces*, 2017, **9**, 391-397.
8. M. Dahbi, M. Kiso, K. Kubota, T. Horiba, T. Chafik, K. Hida, T. Matsuyama and S. Komaba, *J. Mater. Chem. A*, 2017, **5**, 9917-9928.
9. X. Ren, S.-D. Xu, S. Liu, L. Chen, D. Zhang and L. Qiu, *J. Electroanal. Chem.*, 2019, **841**, 63-72.
10. P. Wang, K. Zhu, K. Ye, Z. Gong, R. Liu, K. Cheng, G. Wang, J. Yan and D. Cao, *J. Colloid Interface Sci.*, 2020, **561**, 203-210.
11. F. Wu, M. Zhang, Y. Bai, X. Wang, R. Dong and C. Wu, *ACS Appl. Mater. Interfaces*, 2019, **11**, 12554-12561.
